# Supplementary material for: A simple route to fiber-shaped heterojunctioned nanocomposites for knittable high-performance supercapacitors
Source: Royal Society of Chemistry journal article supplement (doi:10.1039/d0ta04150e), 2020-01-01
Supplement: d0ta04150e1.pdf [file d0ta04150e1.pdf]

## Supporting Information

### **Simple Route to Fiber-Shaped Heterojunctioned Nanocomposites for Knittable High-Performance Supercapacitors**

Xin Zhang,<sup>a</sup> Xing Chen,<sup>a</sup> Tian Bai,<sup>a</sup> Jiaqi Chai,<sup>a</sup> Xin Zhao,<sup>a</sup> Meidan Ye,<sup>\*a,b</sup> Zhiqun Lin,<sup>\*b</sup> and Xiangyang Liu,<sup>\*a, c</sup>

a. Research Institute for Biomimetics and Soft Matter, Fujian Provincial Key Laboratory for Soft Functional Materials Research, Department of Physics, Xiamen University, Xiamen 361005, China

b. School of Materials Science and Engineering, Georgia Institute of Technology, Atlanta, GA 30332, USA

c. Department of Physics, Faculty of Science, National University of Singapore, Singapore

\*Corresponding authors: [mdye@xmu.edu.cn](mailto:mdye@xmu.edu.cn), [zhiqun.lin@mse.gatech.edu](mailto:zhiqun.lin@mse.gatech.edu), and [liuxy@xmu.edu.cn](mailto:liuxy@xmu.edu.cn)

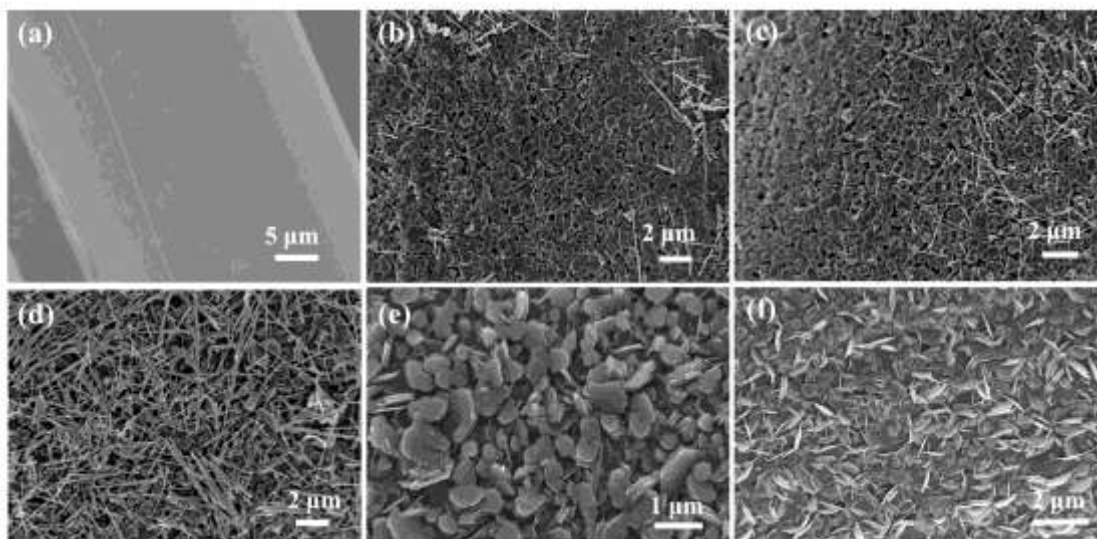

**Fig. S1** SEM images of (a) pure stainless steel microwire ( $D = 30 \mu\text{m}$ ), and (b-d) the  $\text{NiCo}_2\text{S}_4@\text{MgS}$  nanocomposites synthesized via the first-step hydrothermal reaction in the solution containing  $\text{NiCl}_2 \cdot 6\text{H}_2\text{O}$ ,  $\text{CoCl}_2 \cdot 6\text{H}_2\text{O}$ ,  $\text{MgCl}_2 \cdot 6\text{H}_2\text{O}$ , urea and  $\text{NH}_4\text{F}$  at  $120^\circ\text{C}$  for different times: (b) 12 h, (c) 16 h and (d) 20 h, followed by the second-step hydrothermal reaction in the  $\text{Na}_2\text{S}$  solution at  $80^\circ\text{C}$  for 6 h. (e) SEM image of the  $\text{NiCo}_2\text{S}_4$  nanosheets grown on the stainless steel microwire prepared via the first-step hydrothermal reaction in the solution containing only  $\text{NiCl}_2 \cdot 6\text{H}_2\text{O}$ ,  $\text{CoCl}_2 \cdot 6\text{H}_2\text{O}$ , urea and  $\text{NH}_4\text{F}$  (i.e., no  $\text{MgCl}_2 \cdot 6\text{H}_2\text{O}$ ) at  $120^\circ\text{C}$  for 24 h, followed by the second-step hydrothermal reaction in the  $\text{Na}_2\text{S}$  solution at  $80^\circ\text{C}$  for 6 h. (f) SEM image of the  $\text{MgS}$  film grown on the stainless steel wire produced via the first-step hydrothermal reaction in the solution containing solely  $\text{MgCl}_2 \cdot 6\text{H}_2\text{O}$ , urea and  $\text{NH}_4\text{F}$  (i.e., no  $\text{NiCl}_2 \cdot 6\text{H}_2\text{O}$ ,  $\text{CoCl}_2 \cdot 6\text{H}_2\text{O}$ ) at  $120^\circ\text{C}$  for 24 h, followed by the second-step hydrothermal reaction in the  $\text{Na}_2\text{S}$  solution at  $80^\circ\text{C}$  for 6 h.

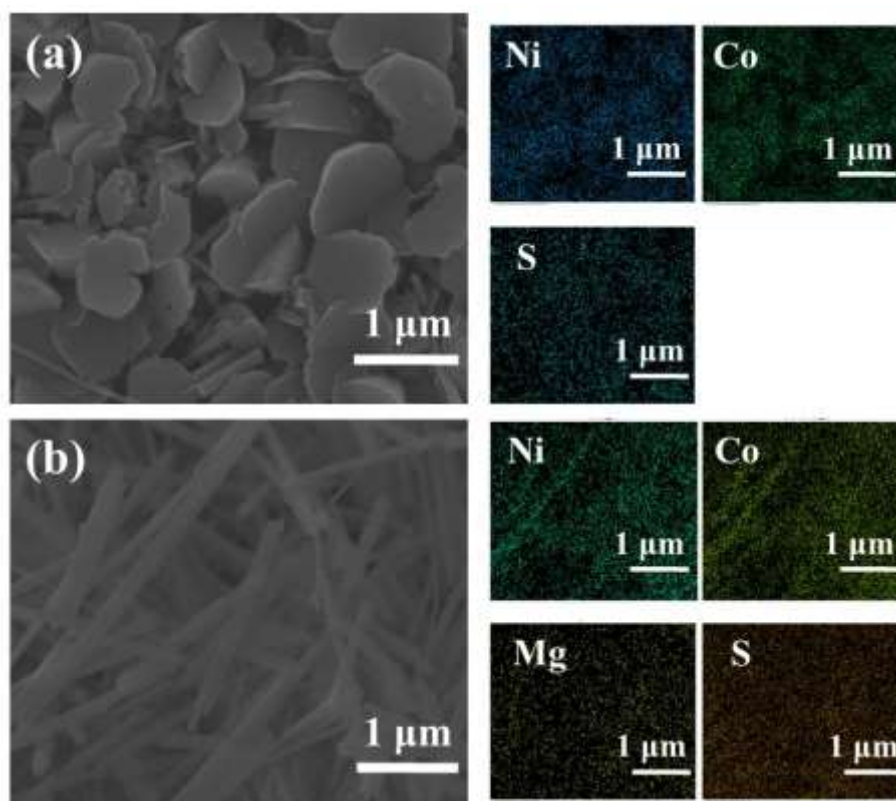

**Fig. S2** EDS mapping of the (a) NiCo<sub>2</sub>S<sub>4</sub> nanosheets and (b) MgS nanowires within the NiCo<sub>2</sub>S<sub>4</sub>@MgS nanocomposite.

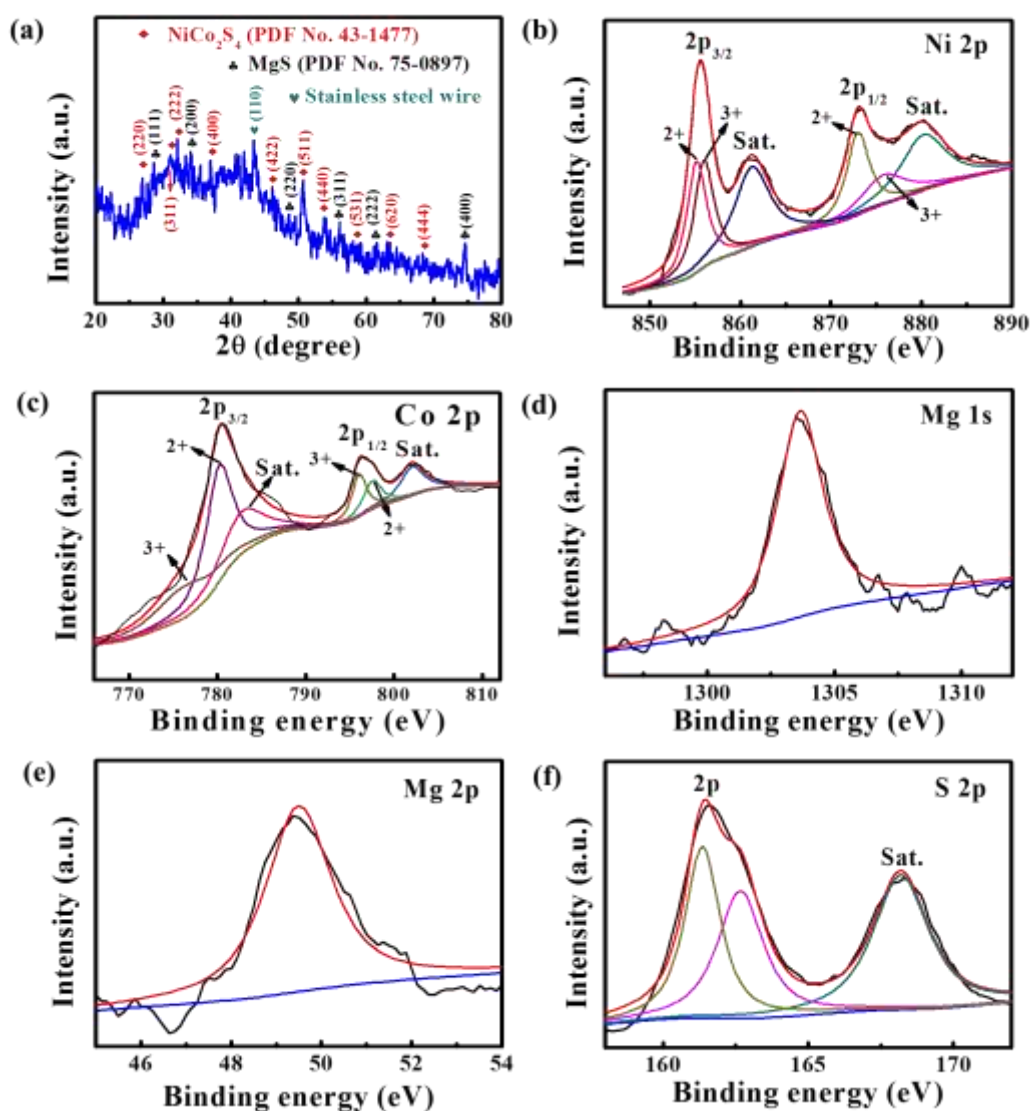

**Fig. S3** (a) XRD pattern of the NiCo<sub>2</sub>S<sub>4</sub>@MgS nanocomposites. High-resolution XPS spectra for the (b) Ni 2p, (c) Co 2p, (d) Mg 1s, (e) Mg 2p and (f) S 2p in the NiCo<sub>2</sub>S<sub>4</sub>@MgS nanocomposites.

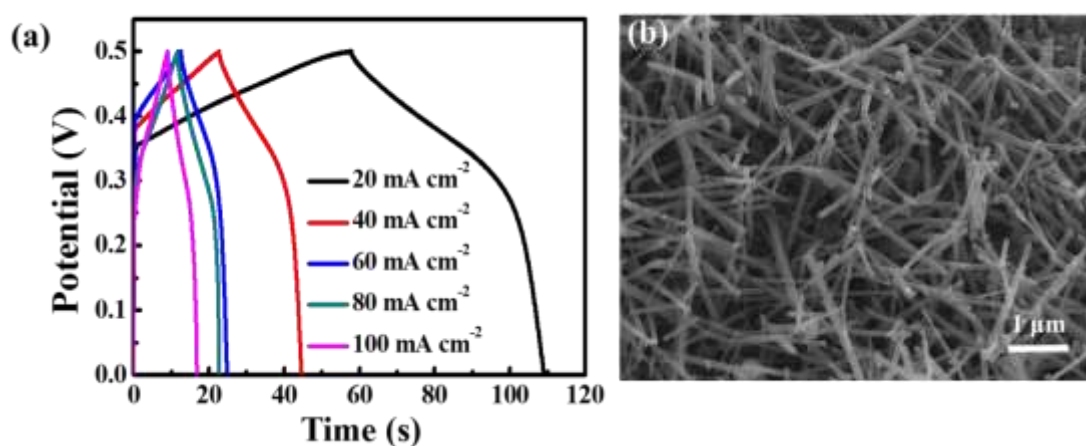

**Fig. S4** (a) Galvanostatic charge-discharge (GCD) of the NiCo<sub>2</sub>S<sub>4</sub>@MgS electrode at high current densities. (b) SEM image of the NiCo<sub>2</sub>S<sub>4</sub>@MgS electrode after the charge-discharge 10000-cycling test.

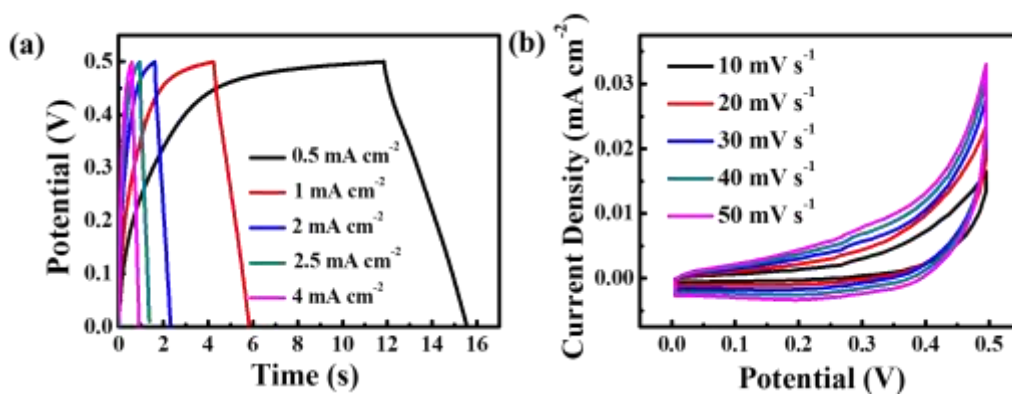

**Fig. S5** (a) GCD and (b) CV curves of the MgS film on the stainless steel microwire prepared via the first-step hydrothermal reaction in the solution only containing MgCl<sub>2</sub>·6H<sub>2</sub>O, urea and NH<sub>4</sub>F at 120 °C for 24 h, followed by the second-step hydrothermal reaction in the Na<sub>2</sub>S solution at 80 °C for 6 h.

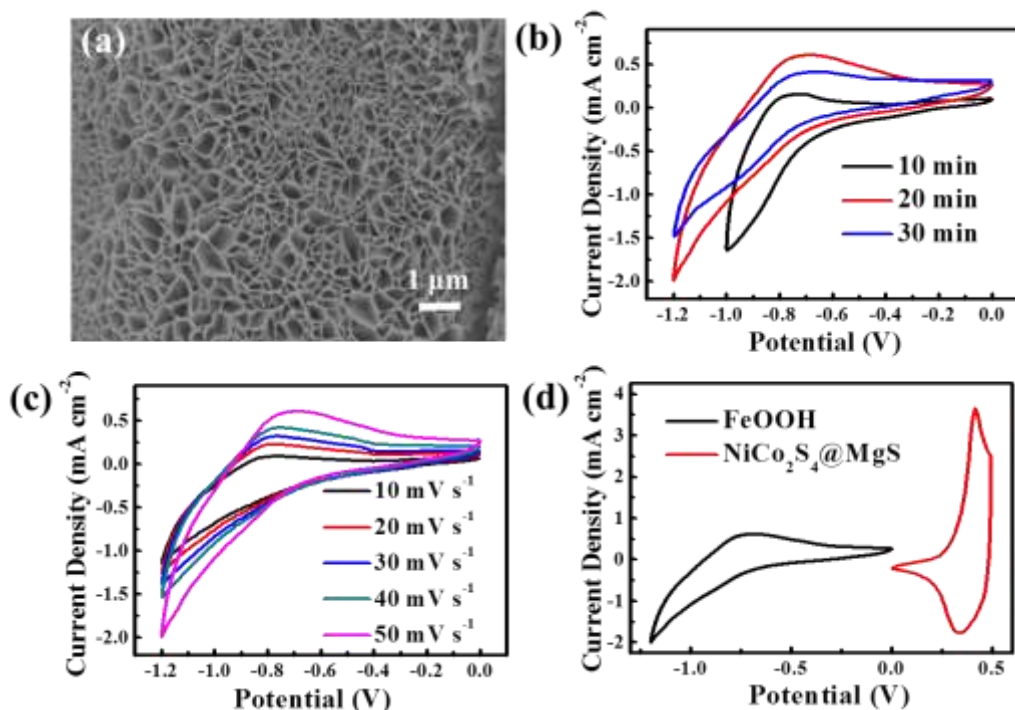

**Fig. S6** (a) SEM image of the FeOOH electrode prepared at a deposition time of 20 min. (b) CV curves at a scan rate of  $50 \text{ mV s}^{-1}$  of the FeOOH electrodes grown on stainless steel microhairs via the electrodeposition method at different deposition times. (c) CV curves at different scan rates of the FeOOH electrode prepared for a deposition time of 20 min. (d) CV curves at a scan rate of  $50 \text{ mV s}^{-1}$  of the  $\text{NiCo}_2\text{S}_4@\text{MgS}$  and FeOOH electrodes prepared for a deposition time of 20 min.

In order to assemble fiber-shaped asymmetric supercapacitors containing the  $\text{NiCo}_2\text{S}_4@\text{MgS}$  nanocomposites as the positive electrode, the FeOOH negative electrode (**Figure S5a**) was grown on stainless steel microwire by electrodeposition. **Figure S5b** shows the CV curves of the FeOOH negative electrode prepared at different deposition times. It can be seen that the sample obtained at the deposition time of 20 min has the best CV performance and its CV curves tested at different scan rate are shown in **Figure S5c**. The

reactions of the FeOOH electrode are as follows:<sup>[1]</sup>

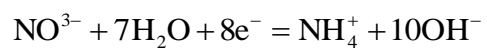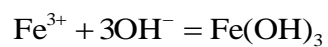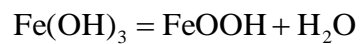

The CV curves of the FeOOH and NiCo<sub>2</sub>S<sub>4</sub>@MgS electrodes are shown in **Figure S5d**. The area of the CV curve suggests the quantity of electric charge (Q) of the electrodes, and the area ratio of NiCo<sub>2</sub>S<sub>4</sub>@MgS to FeOOH is 1:0.8, indicating that the Q ratio is 1:0.8.

**Table S1.** Comparison of the volumetric energy density ( $E$ ) and power density ( $P$ ) between the FASCs in the present study and the reported values in literatures.

| Samples (positive electrode//negative electrode)                                                                                                | $E$ (mWh cm <sup>-3</sup> ) | $P$ (W cm <sup>-3</sup> ) | <i>Refs.</i> |
|-------------------------------------------------------------------------------------------------------------------------------------------------|-----------------------------|---------------------------|--------------|
| NiCo <sub>2</sub> S <sub>4</sub> @MgS network-like nanostructures on stainless steel microhairs//FeOOH nanosheets on stainless steel microhairs | 107.5                       | 1.7                       | This work    |
| NiCo <sub>2</sub> O <sub>4</sub> nanosheets on Ni wires//NiCo <sub>2</sub> O <sub>4</sub> nanosheets on Ni wires                                | 1.44                        | 17                        | 25           |
| carbon fiber thread@PANI//functionalized carbon fiber thread                                                                                    | 2                           | 10.22                     | 45           |
| graphene nanoribbon fiber//MnO <sub>2</sub> on graphene nanoribbon fiber                                                                        | 5.7                         | 0.08                      | 46           |
| CoNiO <sub>2</sub> nanowires on carbon fiber//active carbon on carbon fiber                                                                     | 0.50                        | 0.213                     | 47           |
| porous Mn-Ni-Co-S nanotubes on carbon nanotube fiber//VN nanowires on carbon nanotube fiber                                                     | 52                          | 0.582                     | 48           |
| Fe <sub>2</sub> O <sub>3</sub> on carbon fiber//MnO <sub>2</sub> on carbon nanotube-web paper                                                   | 0.43                        | 0.02                      | 49           |
| MnO <sub>2</sub> on carbon fiber//FeOOH/PPy on carbon fiber                                                                                     | 3.7                         | 0.19                      | 50           |
| Mo-Ni-Co-O nanowire on carbon nanotube                                                                                                          | 22.2                        | 0.21                      | 51           |

|                                                                                 |       |      |    |
|---------------------------------------------------------------------------------|-------|------|----|
| fiber//VN nanowires on carbon nanotube fiber                                    |       |      |    |
| Zn-Ni-Co-O nanowires on carbon nanotube<br>fiber//VN@C on carbon nanotube strip | 33.66 | 0.40 | 52 |
| PANI@CNTs on carbon fiber//MnO <sub>2</sub> @CNTs on<br>carbon fiber            | 8.3   | 0.1  | 53 |
